# Supplementary material for: Two new luminescence cadmium coordination polymers constructed by 4,4′-di(4H-1,2,4-triazol-4-yl)-1,1′-biphenyl and polycarboxylic acids: syntheses, structures, Fe3+ identifying and photo-degradable properties
Source: Royal Society of Chemistry journal article supplement (doi:10.1039/c7ra10855a), 2018-01-01
Supplement: c7ra10855a1.pdf [file c7ra10855a1.pdf]

## Supporting Information

### **Two new luminescence cadmium coordination polymers constructed by 4,4'-di(4H-1,2,4-triazol-4-yl)-1,1'-biphenyl and polycarboxylic acids: Syntheses, Structures, Fe<sup>3+</sup> identifying and photo-degradable properties**

Qi Huang<sup>a</sup>, Ji-Han Huang<sup>a</sup>, Lei Gu<sup>a</sup>, Jia-xin Ruan<sup>a</sup>, Ying-Hui Yu<sup>\*a</sup> and Jin-Sheng Gao<sup>\*ab</sup>

<sup>a</sup>School of Chemistry and Materials Science, Heilongjiang University, Harbin 150080, China

<sup>b</sup>Agricultural college, Heilongjiang University, Harbin 150080

\*Corresponding author. E-mail: E-mail: yuyinghui@hlju.edu.cn (Y.H.Yu); gaojins@hlju.edu.cn (J.S. Gao). Tel: (86)431-8516-8481. Fax: (86)431-8519-3421.

Table S1 Selected bond distances (Å) and angles (°) for **CP 1**

| <b>1</b>      |            |                       |           |
|---------------|------------|-----------------------|-----------|
| Cd(1)-O(3)#2  | 2.2357(19) | O(13)-Cd(1)-O(5)#3    | 103.98(8) |
| Cd(1)-O(1)    | 2.258(2)   | N(2)-Cd(1)-O(5)#3     | 78.39(7)  |
| Cd(1)-O(13)   | 2.360(3)   | O(6)#3-Cd(1)-O(5)#3   | 51.89(6)  |
| Cd(1)-N(2)    | 2.373(2)   | N(5)-Cd(2)-N(8)       | 164.89(9) |
| Cd(1)-O(6)#3  | 2.440(2)   | N(5)-Cd(2)-O(14)      | 82.86(9)  |
| Cd(1)-O(5)#3  | 2.526(2)   | N(8)-Cd(2)-O(14)      | 83.48(9)  |
| Cd(2)-N(5)    | 2.278(2)   | N(5)-Cd(2)-O(8)       | 99.24(9)  |
| Cd(2)-N(8)    | 2.294(3)   | N(8)-Cd(2)-O(8)       | 88.84(9)  |
| Cd(2)-O(14)   | 2.319(2)   | O(14)-Cd(2)-O(8)      | 147.33(8) |
| Cd(2)-O(8)    | 2.335(2)   | N(5)-Cd(2)-O(11)#4    | 105.04(9) |
| Cd(2)-O(11)#4 | 2.354(2)   | N(8)-Cd(2)-O(11)#4    | 88.76(9)  |
| Cd(2)-O(12)#4 | 2.574(2)   | O(14)-Cd(2)-O(11)#4   | 130.27(8) |
| Cd(2)-O(7)    | 2.595(2)   | O(8)-Cd(2)-O(11)#4    | 81.01(7)  |
| Cd(3)-O(16)   | 2.245(2)   | N(5)-Cd(2)-O(12)#4    | 86.38(10) |
| Cd(3)-N(3)#5  | 2.302(2)   | N(8)-Cd(2)-O(12)#4    | 97.71(10) |
| Cd(3)-O(15)   | 2.318(2)   | O(14)-Cd(2)-O(12)#4   | 80.50(8)  |
| Cd(3)-O(10)   | 2.326(2)   | O(8)-Cd(2)-O(12)#4    | 132.09(7) |
| Cd(3)-O(5)#6  | 2.382(2)   | O(11)#4-Cd(2)-O(12)#4 | 51.96(7)  |
| Cd(3)-O(9)    | 2.455(2)   | N(5)-Cd(2)-O(7)       | 85.13(8)  |
| N(3)-Cd(3)#5  | 2.302(2)   | N(8)-Cd(2)-O(7)       | 89.79(9)  |
| O(3)-Cd(1)#2  | 2.2357(19) | O(14)-Cd(2)-O(7)      | 95.55(8)  |
| O(5)-Cd(3)#7  | 2.382(2)   | O(8)-Cd(2)-O(7)       | 52.58(7)  |
| O(5)-Cd(1)#3  | 2.526(2)   | O(11)#4-Cd(2)-O(7)    | 133.59(7) |
| O(6)-Cd(1)#3  | 2.440(2)   | O(12)#4-Cd(2)-O(7)    | 171.03(8) |
| O(11)-Cd(2)#8 | 2.354(2)   | O(16)-Cd(3)-N(3)#5    | 154.98(8) |

|                     |           |                     |           |
|---------------------|-----------|---------------------|-----------|
| O(12)-Cd(2)#8       | 2.574(2)  | O(16)-Cd(3)-O(15)   | 92.56(8)  |
| O(3)#2-Cd(1)-O(1)   | 100.40(8) | N(3)#5-Cd(3)-O(15)  | 84.14(9)  |
| O(3)#2-Cd(1)-O(13)  | 91.03(9)  | O(16)-Cd(3)-O(10)   | 123.07(8) |
| O(1)-Cd(1)-O(13)    | 164.94(7) | N(3)#5-Cd(3)-O(10)  | 79.83(9)  |
| O(3)#2-Cd(1)-N(2)   | 150.23(8) | O(15)-Cd(3)-O(10)   | 116.84(7) |
| O(1)-Cd(1)-N(2)     | 83.37(8)  | N(3)#5-Cd(3)-O(5)#6 | 74.36(8)  |
| O(13)-Cd(1)-N(2)    | 81.86(8)  | O(15)-Cd(3)-O(5)#6  | 141.75(7) |
| O(3)#2-Cd(1)-O(6)#3 | 82.20(7)  | O(10)-Cd(3)-O(5)#6  | 90.38(8)  |
| O(1)-Cd(1)-O(6)#3   | 99.65(8)  | O(16)-Cd(3)-O(9)    | 89.20(8)  |
| O(13)-Cd(1)-O(6)#3  | 91.54(9)  | N(3)#5-Cd(3)-O(9)   | 114.32(8) |
| N(2)-Cd(1)-O(6)#3   | 126.62(8) | O(15)-Cd(3)-O(9)    | 79.17(8)  |
| O(3)#2-Cd(1)-O(5)#3 | 131.29(7) | O(10)-Cd(3)-O(9)    | 54.59(8)  |
| O(1)-Cd(1)-O(5)#3   | 75.77(8)  | O(5)#6-Cd(3)-O(9)   | 138.50(8) |

Symmetric codes: #1 -x+1,-y+3,-z+2; #2 -x+1,-y+1,-z+1; #3 -x,-y+1,-z+1; #4 x-1,y,z; #5 -x,-y+2,-z+1; #6 x,y+1,z; #7 x,y-1,z; #8 x+1,y,z

Table S2 Selected bond distances (Å) and angles (°) for **CP 2**

| 2            |          |                     |            |
|--------------|----------|---------------------|------------|
| Cd(1)-O(6)#3 | 2.233(3) | N(2)-Cd(1)-O(7)#3   | 84.30(12)  |
| Cd(1)-N(2)   | 2.262(3) | O(4)#4-Cd(1)-O(7)#3 | 163.09(10) |
| Cd(1)-O(4)#4 | 2.287(3) | O(1)-Cd(1)-O(7)#3   | 77.53(9)   |
| Cd(1)-O(1)   | 2.360(3) | O(6)#3-Cd(1)-O(2)   | 85.50(10)  |
| Cd(1)-O(7)#3 | 2.369(3) | N(2)-Cd(1)-O(2)     | 167.82(12) |
| Cd(1)-O(2)   | 2.448(3) | O(4)#4-Cd(1)-O(2)   | 78.71(11)  |
| Cd(2)-O(5)#5 | 2.282(3) | O(1)-Cd(1)-O(2)     | 54.41(9)   |
| Cd(2)-O(7)#3 | 2.289(3) | O(7)#3-Cd(1)-O(2)   | 99.71(11)  |
| Cd(2)-N(4)   | 2.315(3) | O(5)#5-Cd(2)-O(7)#3 | 92.45(10)  |
| Cd(2)-O(3)   | 2.335(3) | O(5)#5-Cd(2)-N(4)   | 93.37(12)  |
| Cd(2)-O(9)   | 2.346(3) | O(7)#3-Cd(2)-N(4)   | 152.74(11) |
| Cd(2)-O(1)   | 2.429(3) | O(5)#5-Cd(2)-O(3)   | 102.56(10) |

|                     |            |                   |            |
|---------------------|------------|-------------------|------------|
| O(4)-Cd(1)#6        | 2.287(3)   | O(7)#3-Cd(2)-O(3) | 110.83(11) |
| O(5)-Cd(2)#7        | 2.282(3)   | N(4)-Cd(2)-O(3)   | 93.81(12)  |
| O(6)-Cd(1)#8        | 2.233(3)   | O(5)#5-Cd(2)-O(9) | 98.79(11)  |
| O(7)-Cd(2)#8        | 2.289(3)   | O(7)#3-Cd(2)-O(9) | 75.58(10)  |
| O(7)-Cd(1)#8        | 2.369(3)   | N(4)-Cd(2)-O(9)   | 77.23(11)  |
| O(6)#3-Cd(1)-N(2)   | 106.58(12) | O(3)-Cd(2)-O(9)   | 157.30(11) |
| O(6)#3-Cd(1)-O(4)#4 | 116.77(11) | O(5)#5-Cd(2)-O(1) | 169.74(10) |
| N(2)-Cd(1)-O(4)#4   | 94.08(13)  | O(7)#3-Cd(2)-O(1) | 77.68(9)   |
| O(6)#3-Cd(1)-O(1)   | 128.56(11) | N(4)-Cd(2)-O(1)   | 96.69(11)  |
| N(2)-Cd(1)-O(1)     | 116.12(11) | O(3)-Cd(2)-O(1)   | 78.76(10)  |
| O(4)#4-Cd(1)-O(1)   | 88.20(10)  | O(9)-Cd(2)-O(1)   | 81.60(10)  |
| O(6)#3-Cd(1)-O(7)#3 | 79.65(10)  |                   |            |

---

Symmetric codes: #1 -x+3,-y,-z+3; #2 -x+1,-y,-z; #3 x+1,-y+1/2,z+1/2 ; #4 x,-y+1/2,z+1/2 ; #5 x+1,y,z ; #6 x,-y+1/2,z-1/2 ; #7 x-1,y,z ; #8 x-1,-y+1/2,z-1/2

---

**Synthesis of {4-[4-(1H-1, 2, 4-triazol-1-yl) phenyl] phenyl}-1H-1, 2, 4-tri-azole (L).** The past obtained after mixing 4,4'-diaminodiphenyl-y mass methane (0.925 g, 4.66 mmol), 1 equiv) and 1 (2 g, 9.33mmol, 2 equiv) in toluene(25 mL) was stirred vigorously and refluxed for 8 h. The pale yellow solid obtained was filtered, and washed with cold EtOH (1 × 3 mL). The solid was dissolved in hot EtOH (10 mL), treated with a pinch of charcoal and filtered. White crystals obtained was separated and dried under vacuum; yield: 2.10g (75%); mp 262 °C.IR (KBr): 3095 (m), 2775 (m), 1635 (m), 1562 (m), 1523 (s), 1243(s), 1095 (s), 998 (m), 867 (m), 817 (m), 792 (s), 636 cm<sup>-1</sup>(s). <sup>1</sup>H NMR (300 MHz, DMSO-d<sub>6</sub>, 298 K): d = 9.1 (s, 4 H), 7.65 (d, J= 8.5 Hz, 4 H), 7.45 (d, J= 8.5 Hz, 4 H), 4.0 (s, 2 H). <sup>13</sup>C NMR (75 MHz, DMSO-d<sub>6</sub>, 298 K): d = 141.6, 133, 132, 130.2,121.8, 34.8. MS: m/z = 303.04 (M<sup>+</sup> H<sup>+</sup>).Anal. Calcd for C<sub>17</sub>H<sub>14</sub>N<sub>6</sub> (302.34): C, 67.54; H, 4.67; N, 27.80.Found: C, 67.79, H, 5.03, N, 27.36.

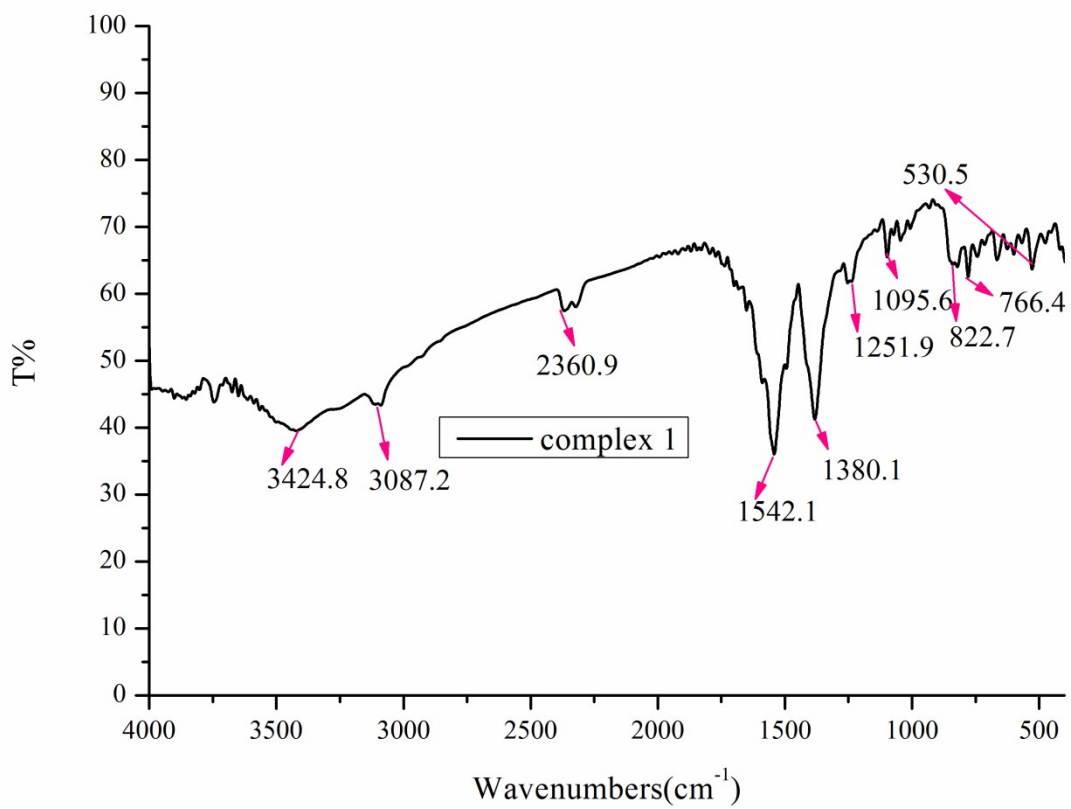

**Figure S1** The IR spectra of CP 1

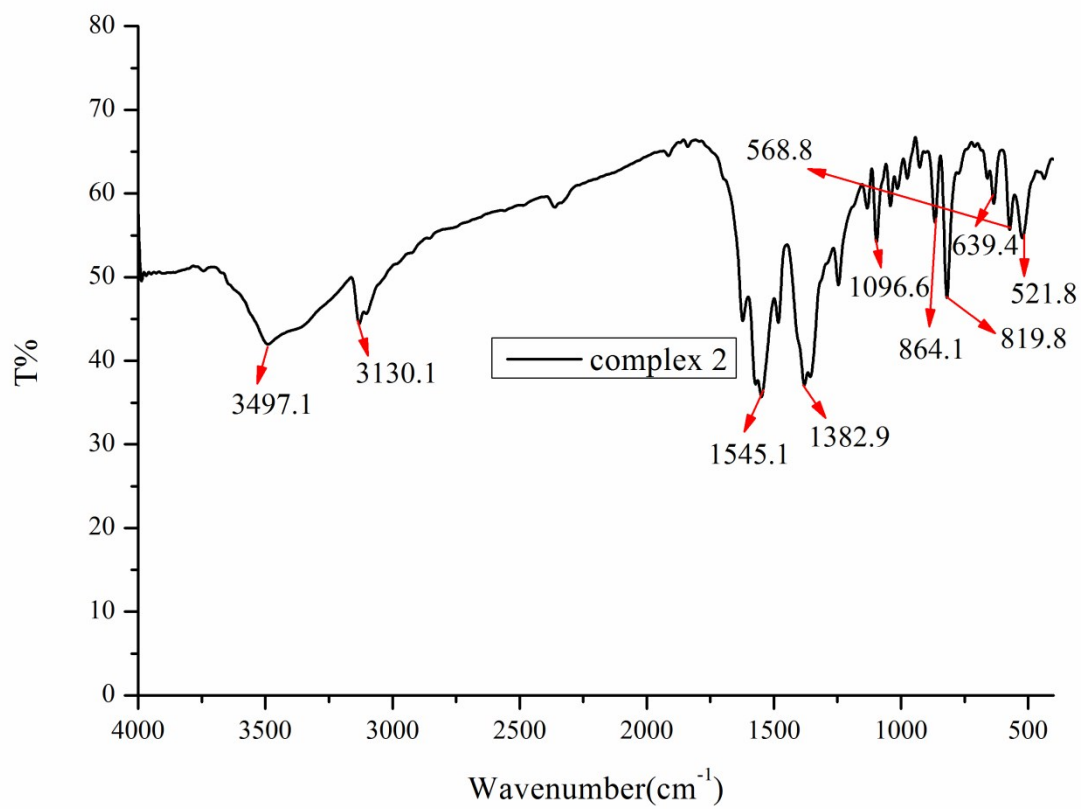

**Figure S2** The IR spectra of CP 2

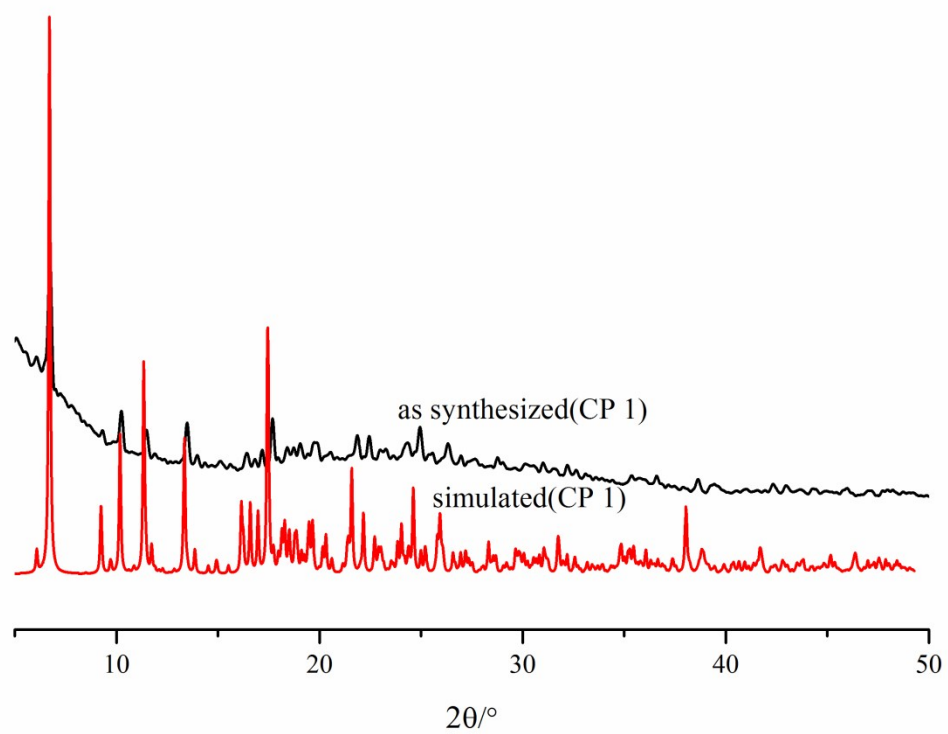

**Figure S3** PXRD patterns of CP 1

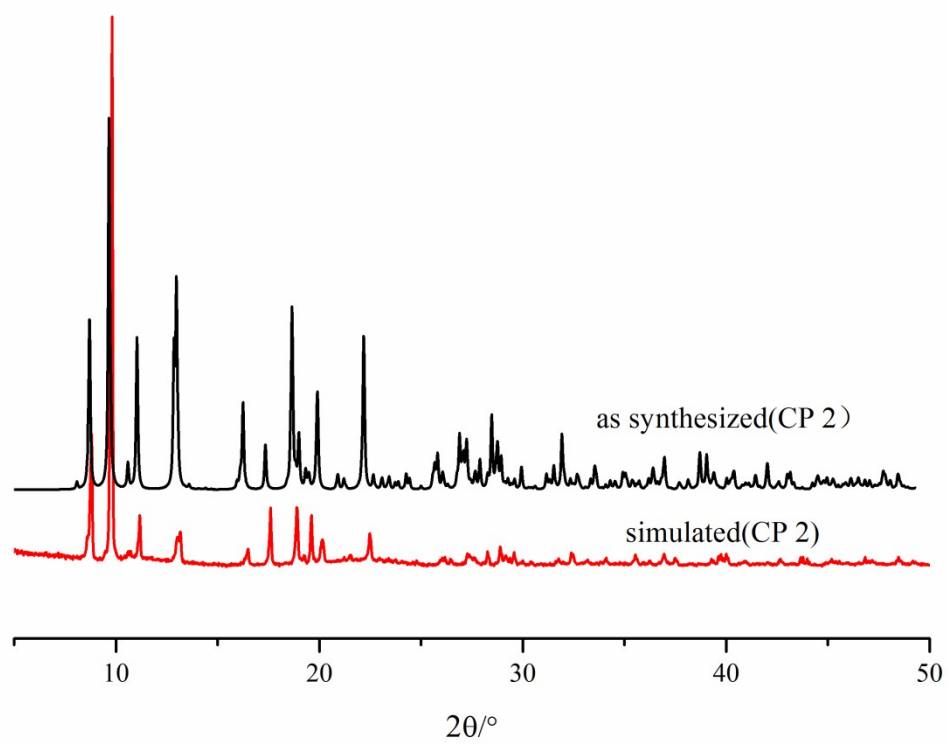

**Figure S4** PXRD patterns of CP 2



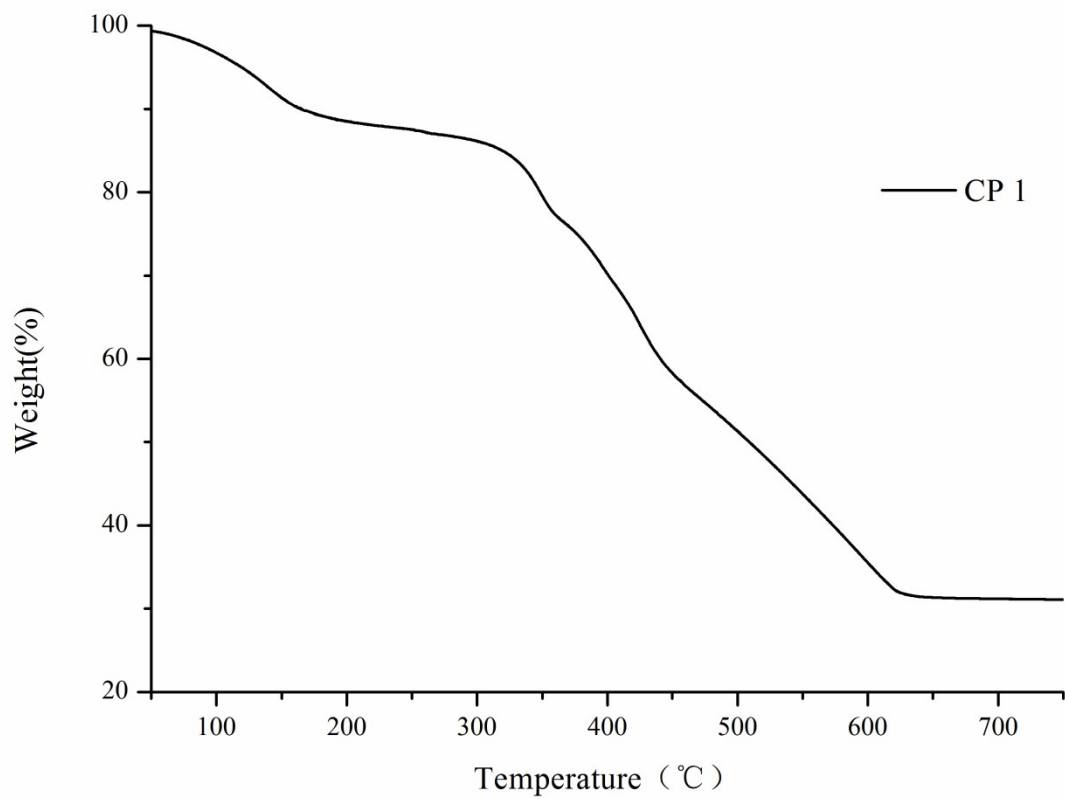

**Figure S5** The TGA diagram of CP 1

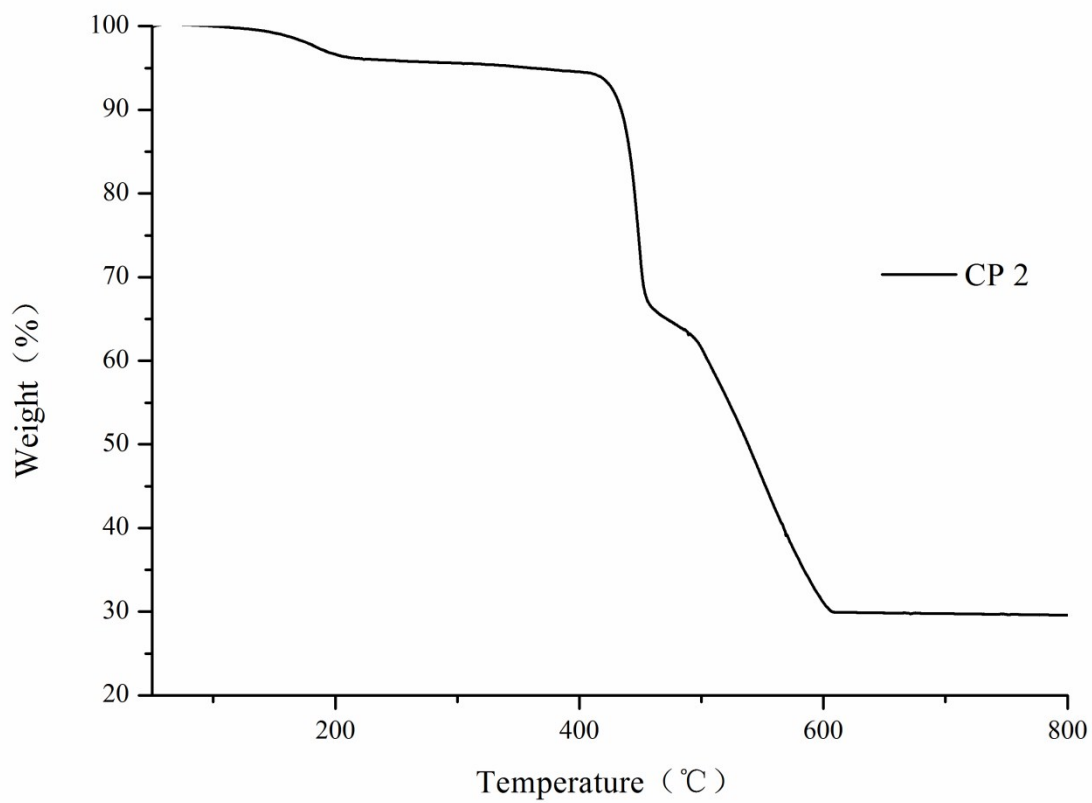

**Figure S6** The TGA diagram of CP 2

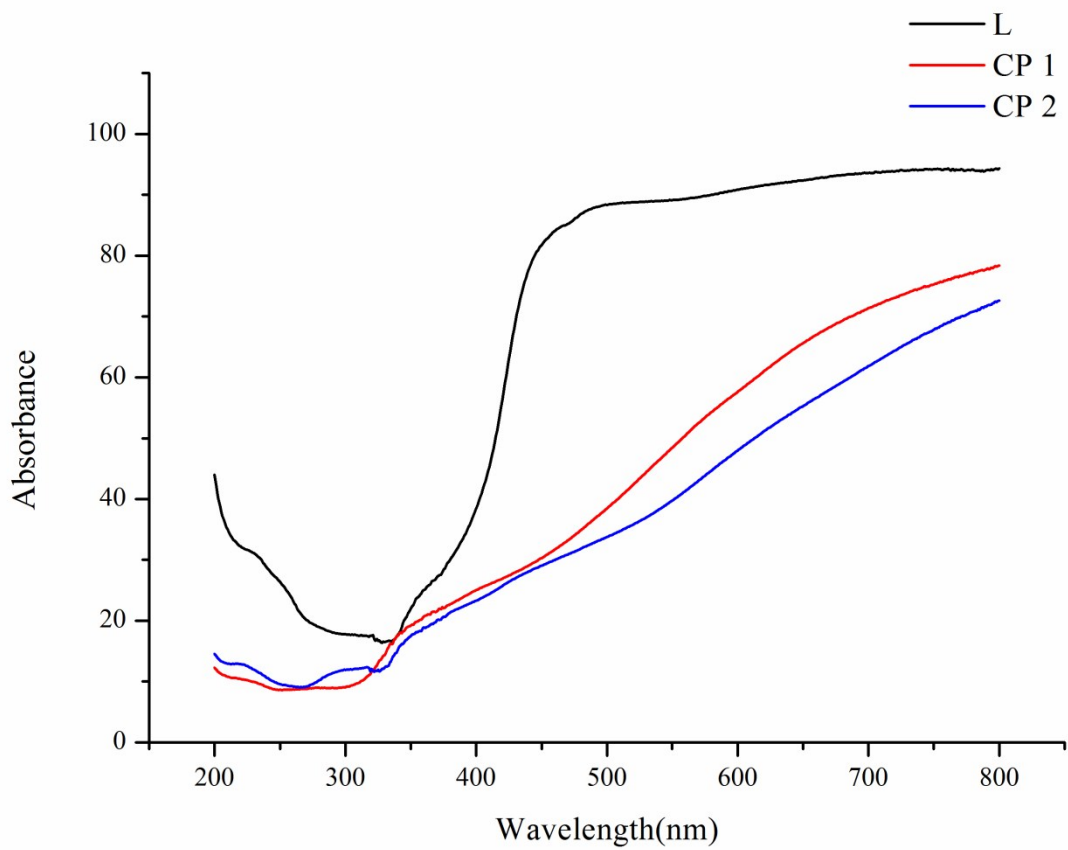

**Figure S7 Solid UV of L, CP 1 and CP 2**
